# Supplementary material for: Age influences on the molecular presentation of tumours
Source: PubMed Central journal article supplement (PMC8752853; doi:10.1038/s41467-021-27889-y), 2022-01-11
Supplement: 41467_2021_27889_MOESM1_ESM.pdf [file 41467_2021_27889_MOESM1_ESM.pdf]

# Supplementary Figures 1-5

**A**

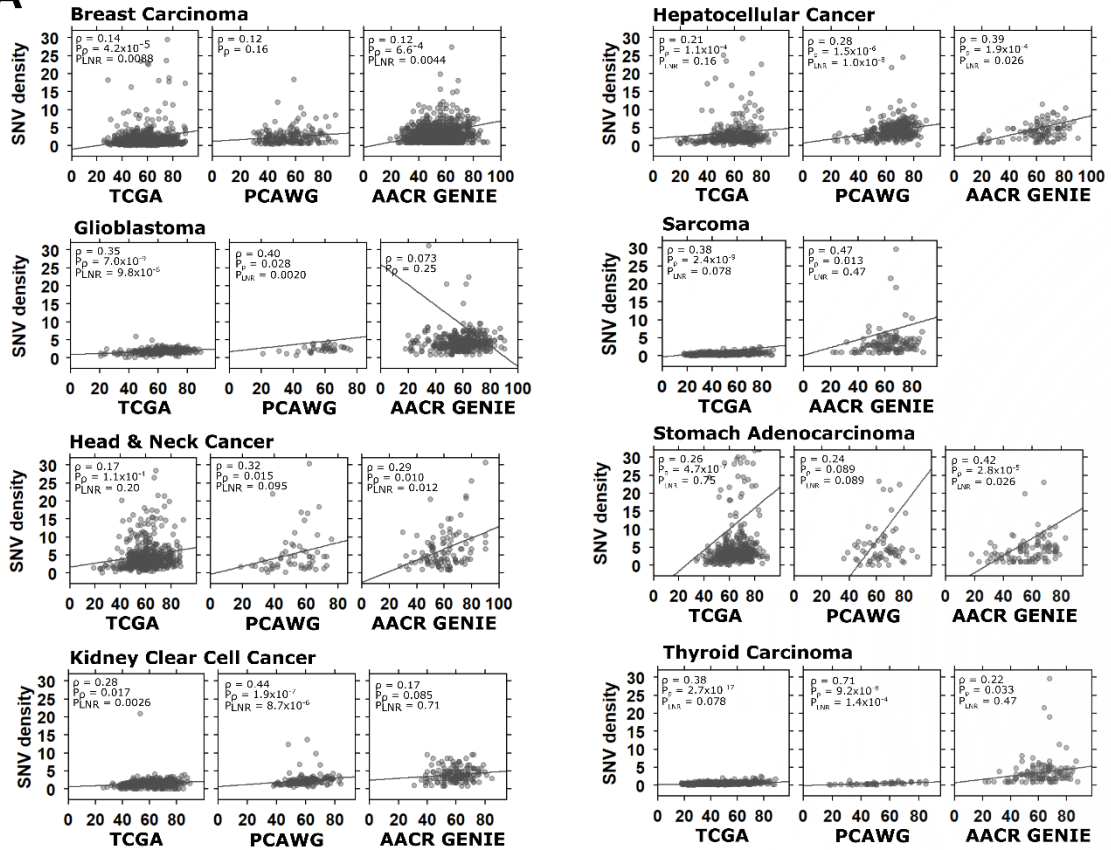

**B**

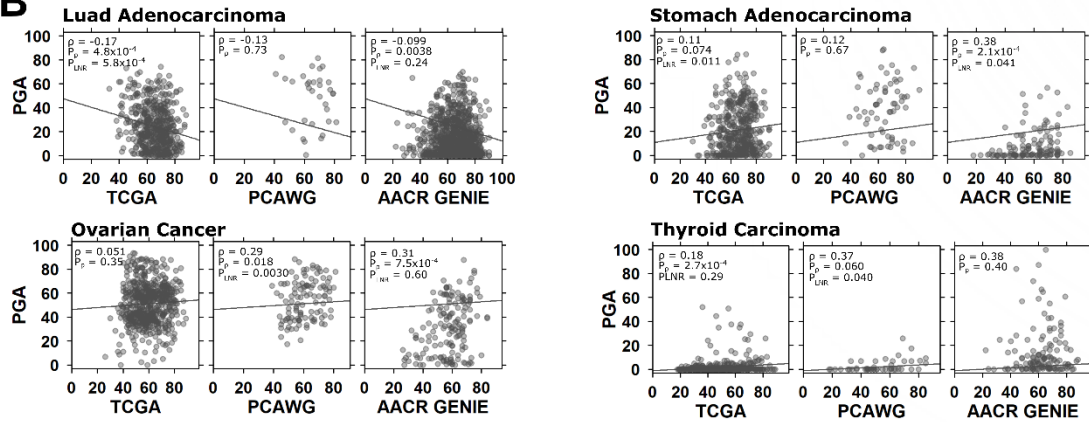

**C**

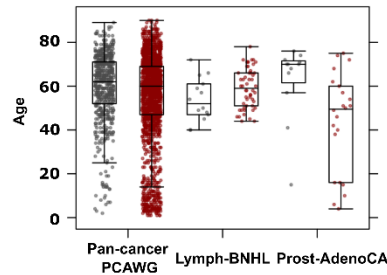

### **Supplementary Figure 1. Age-associated differences in PGA and SNV density.**

Associations of age and **(A)** SNV density and **(B)** PGA compared across three datasets (when available). Spearman correlation coefficient ( $\rho$ ), FDR-adjusted Spearman and multivariate linear regression p-values shown. **(C)** Age compared between monoclonal and polyclonal tumours in pan-cancer PCAWG (n=2,562 biologically independent samples), non-Hodgkin Lymphoma (n=107 biologically independent samples), and prostate cancer (n=199 biologically independent samples). Tukey boxplots are shown with the box indicating quartiles and the whiskers drawn at the lowest and highest points within 1.5 interquartile range of the lower and upper quartiles, respectively. All p-values adjusted for multiple testing.

**A TCGA: LUSC**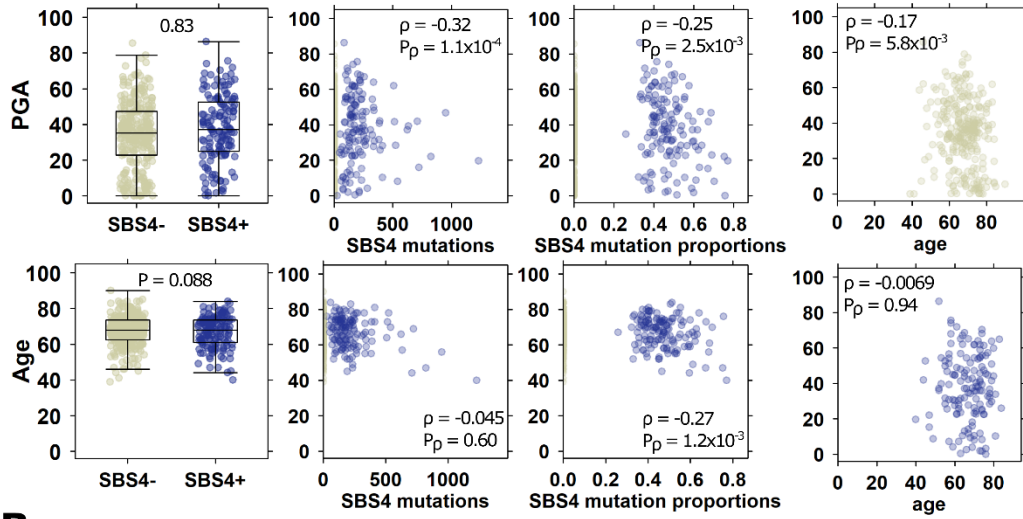**B PCAWG: Lung-AdenoCA**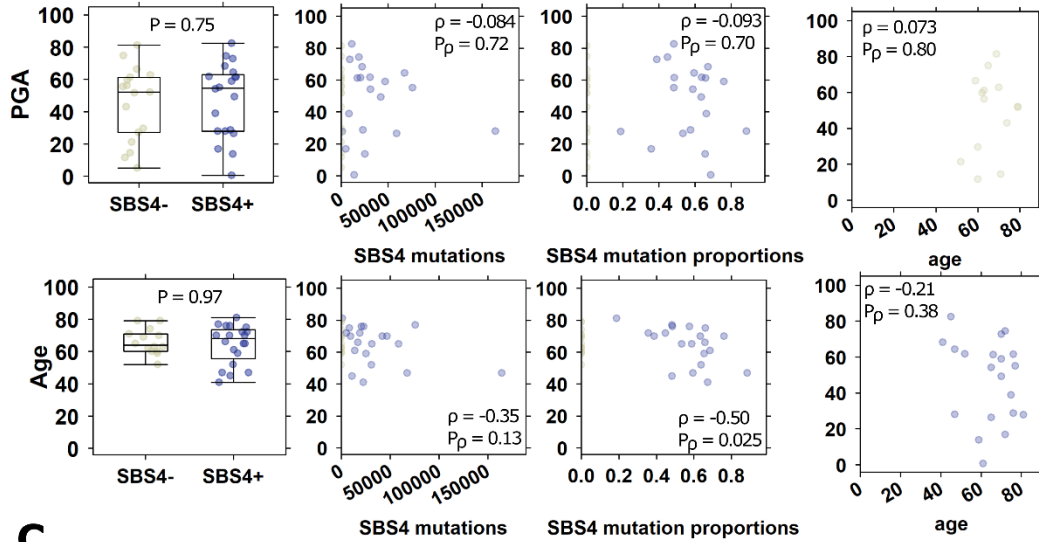**C PCAWG: Liver-HCC**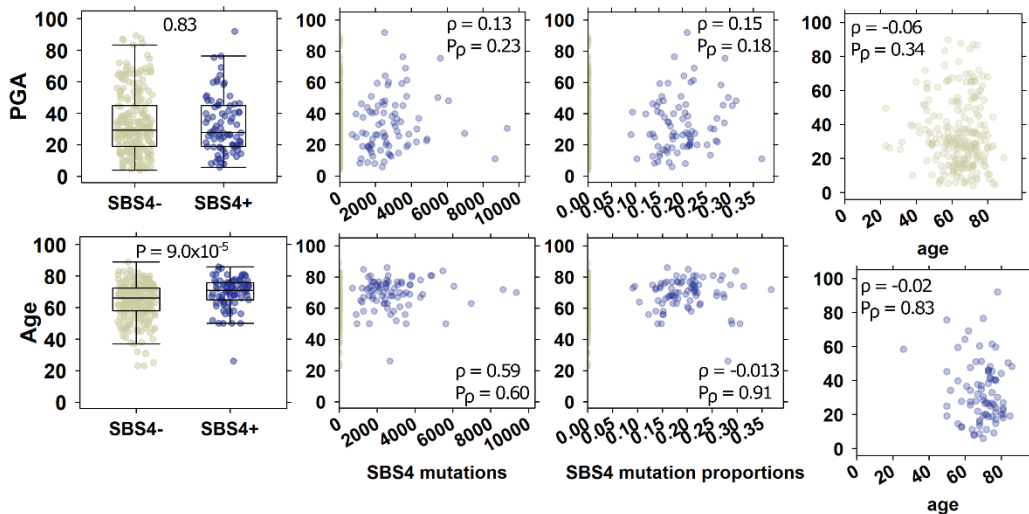

### **Supplementary Figure 2. Associations of age and PGA by mutational signature SBS4.**

Associations of age and PGA with tobacco-related signature SBS4 vary by tumour-type as shown for **(A)** TCGA lung squamous cell carcinoma (n=501 biologically independent samples), **(B)** PCAWG lung adenocarcinoma (n=37 biologically independent samples), and **(C)** PCAWG hepatocellular carcinoma (n=314 biologically independent samples). From left to right, plot columns show comparisons of PGA and Age with SBS4 detection (two-sided Wilcoxon rank sum test), number of SBS-4 attributed mutations (Spearman correlation), relative proportion of SBS4-attributed mutations (Spearman correlation), and PGA vs. age broken down by SBS4-status (SBS4-negative tumours in yellow, SBS-positive tumours in blue; Spearman correlations). Tukey boxplots are shown with the box indicating quartiles and the whiskers drawn at the lowest and highest points within 1.5 interquartile range of the lower and upper quartiles, respectively. All p-values multiple testing adjusted.

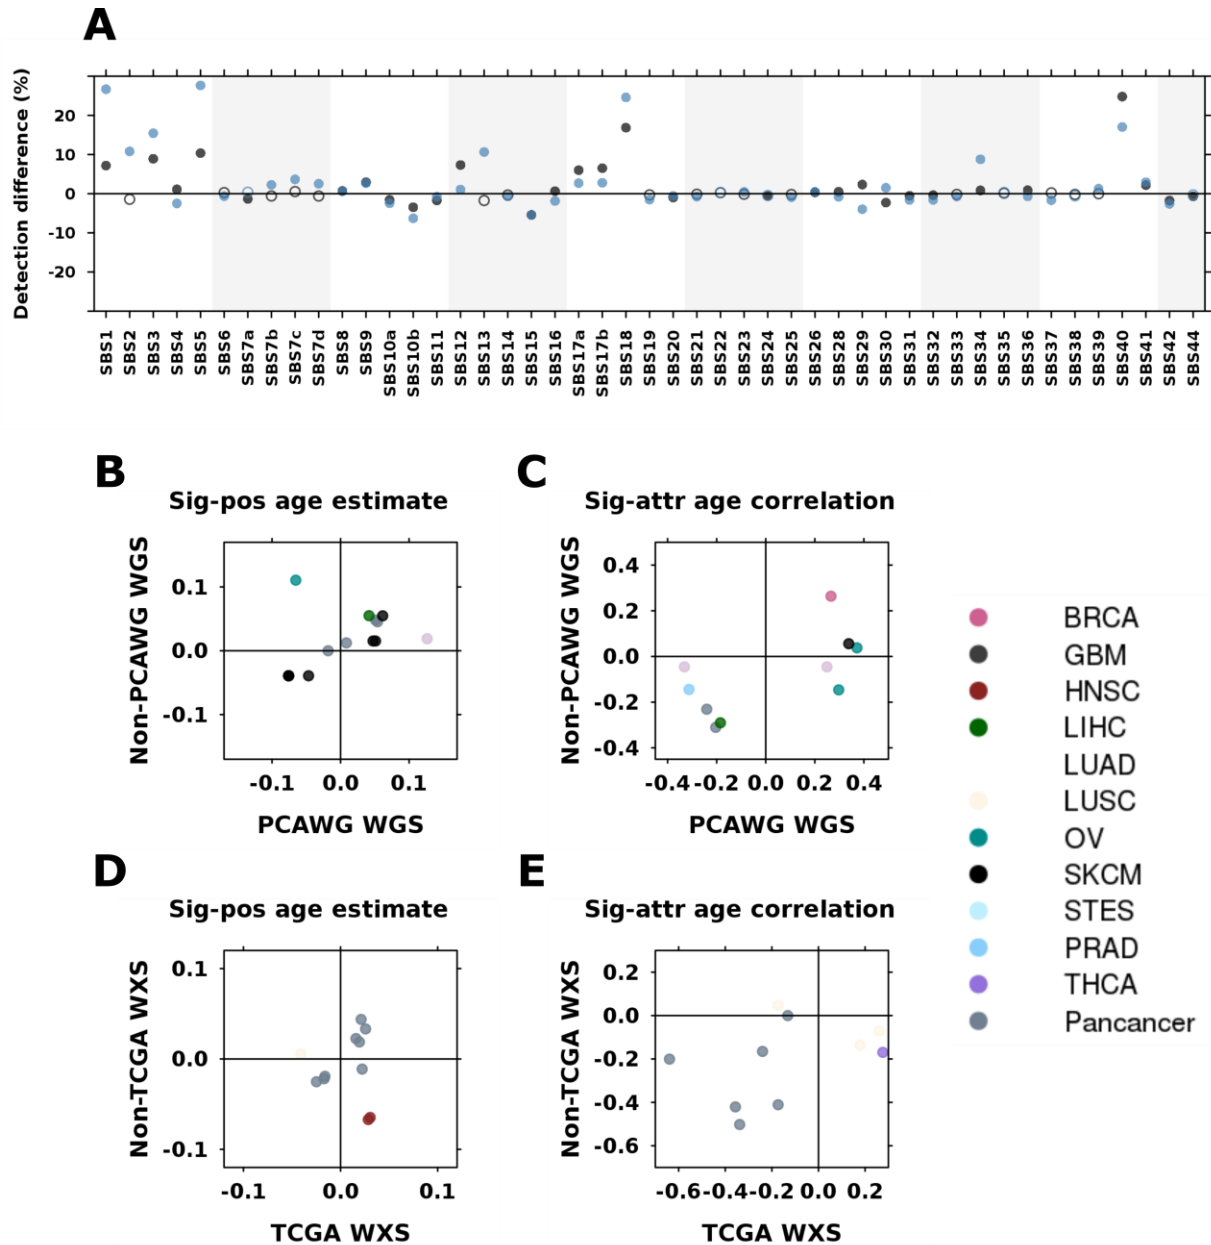

**Supplementary Figure 3. Validation of age-biased signatures in external datasets.**

(A) For each signature, we compared the detection difference between whole genome and exome sequencing. Black dots show the difference in detection between PCAWG WGS and TCGA WXS. Blue dots show the difference in detection between non-PCAWG WGS and non-TCGA WXS. Closed marks indicate comparisons where the difference is statistically significant (proportion test  $p < 0.05$ ) and open marks indicate non-significant comparisons. We use non-PCAWG whole genome sequencing and non-TCGA whole exome sequencing data to examine the effect sizes and direction of signatures found to be age-biased in (B-C) PCAWG and (D-E) TCGA data. (B) and (D) show the logistic regression coefficient estimates for signatures with age-biased detection. (C) and (E) show Spearman's correlation between signature relative activity and age.

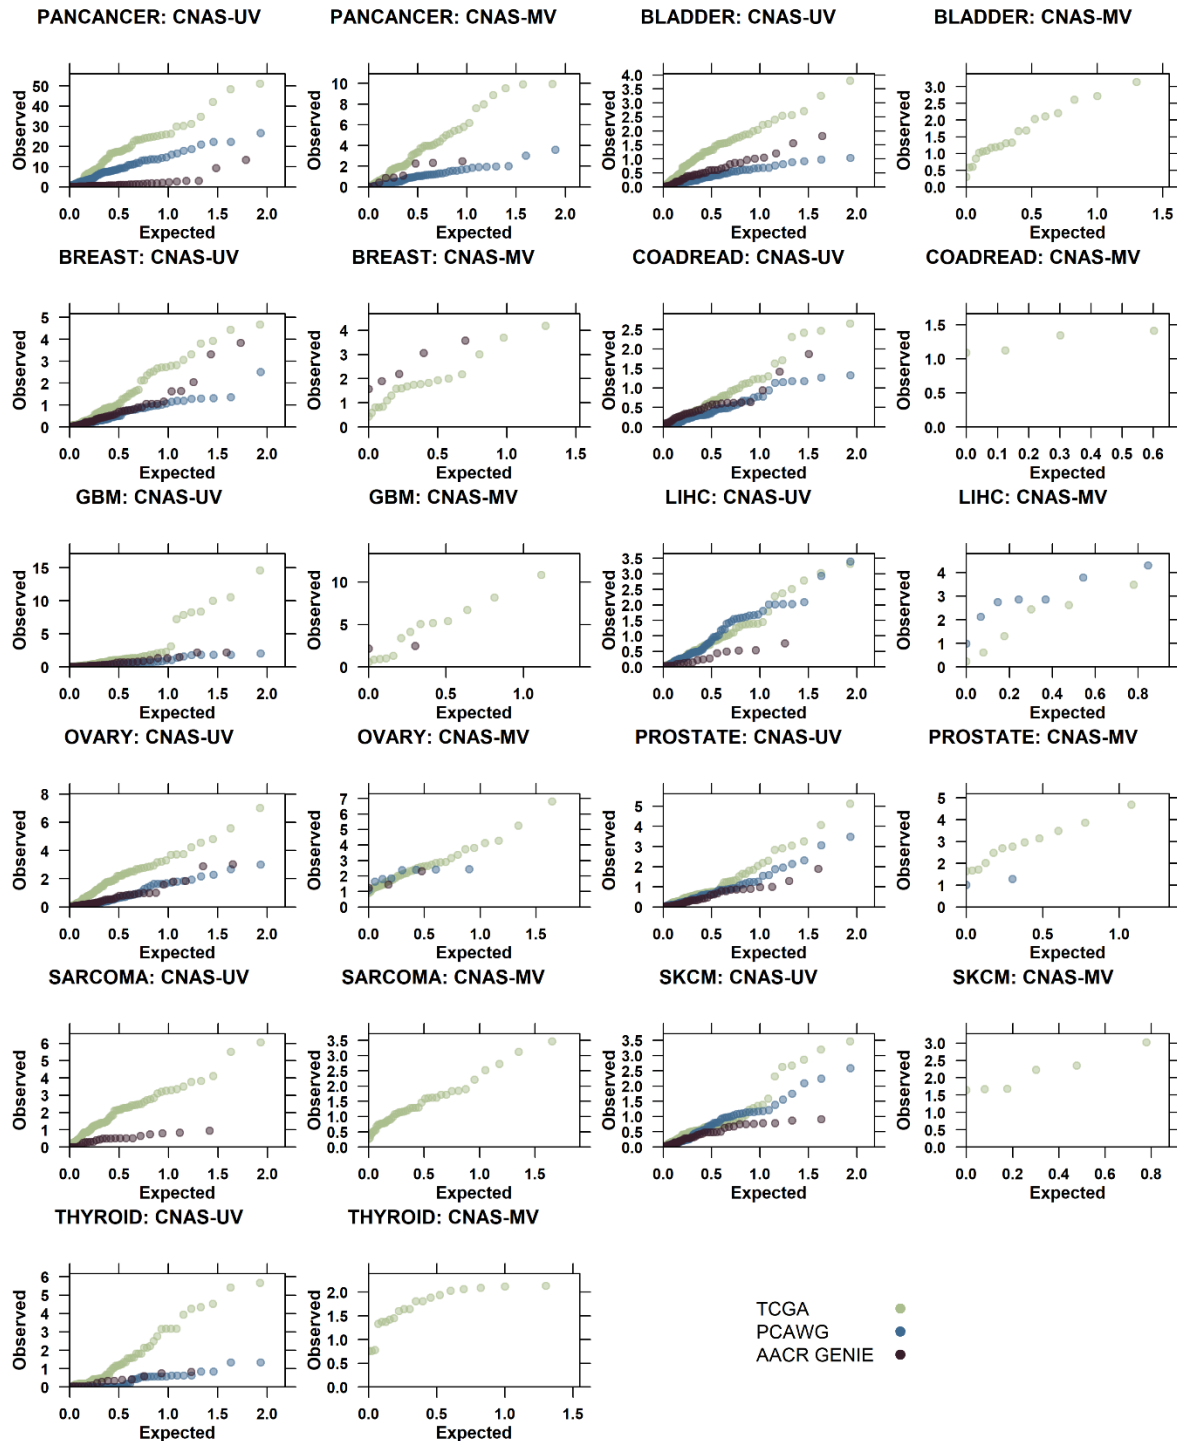

**Supplementary Figure 4. Q-Q plots of CNA-age p-values vs. expected uniform distribution.**

Comparison of  $-\log_{10}(\text{p-value})$  distributions for univariate (UV) and multivariate (MV) CNA-age association tests against expected univariate distributions. Only tumour-types with significant multivariate results shown (as seen in **Figure 3A-C**).

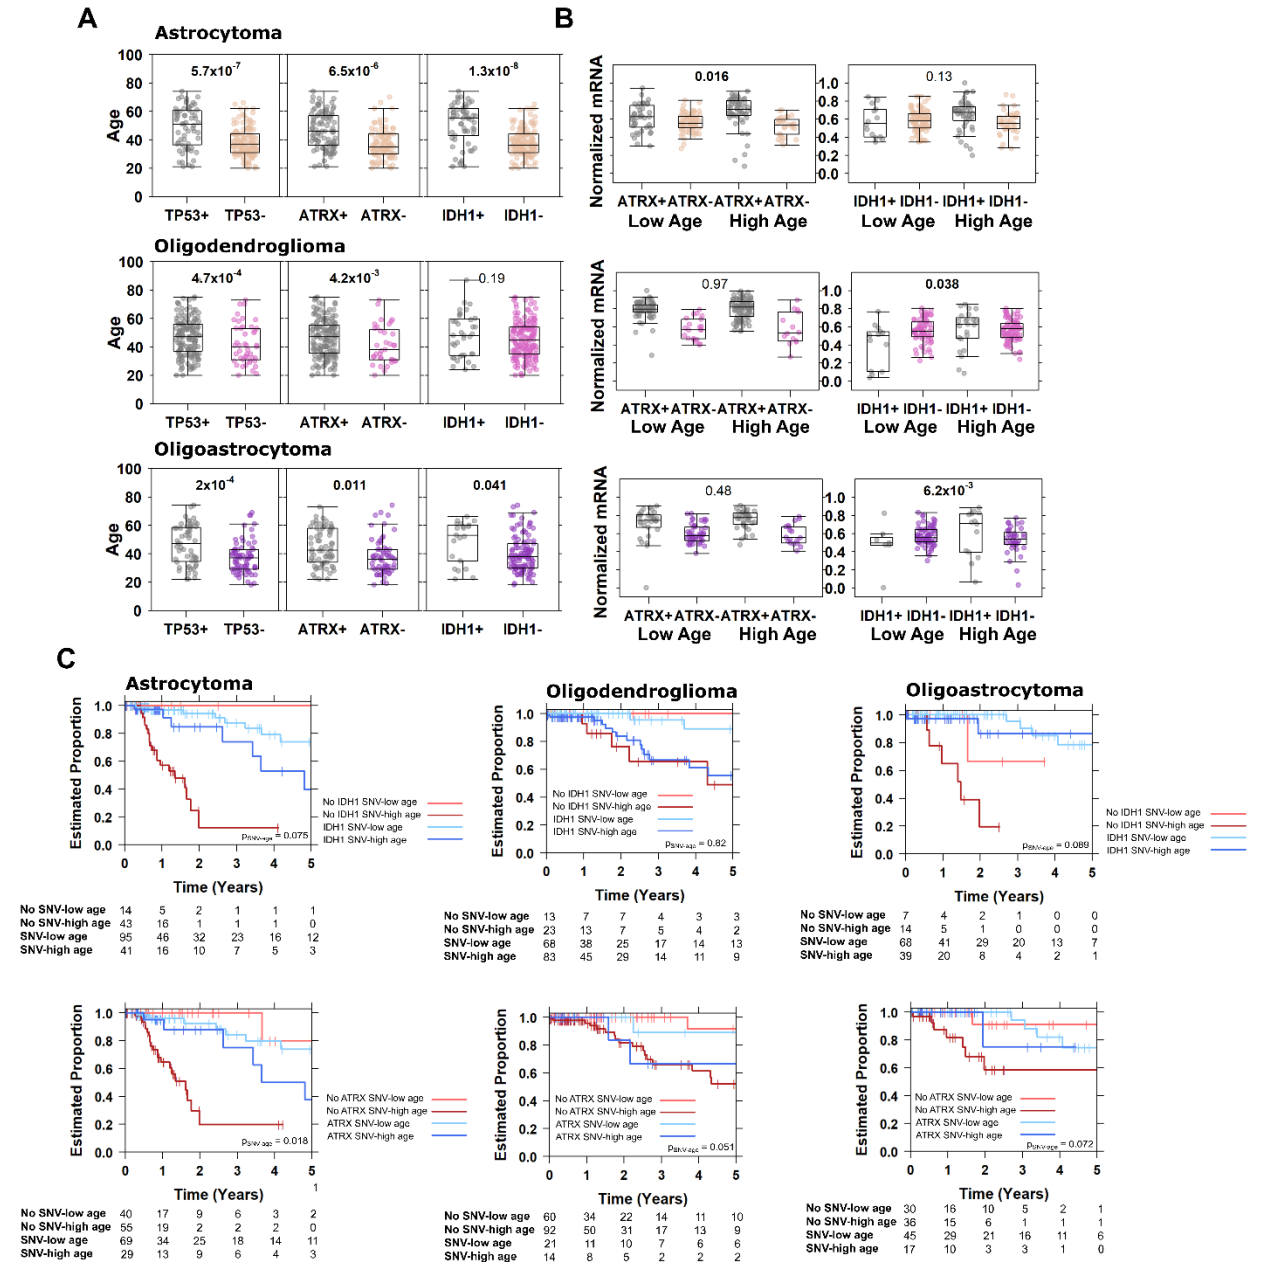

**Supplementary Figure 5. Age-associated driver differences by lower grade glioma subtype.**

(A) Age-associated drivers identified in lower grade glioma have subtype-dependent relationships. Associations of *ATRX* and *IDH1* mutation with (B) mRNA and (C) overall survival are also dependent on subtype. Tukey boxplots are shown with the box indicating quartiles and the whiskers drawn at the lowest and highest points within 1.5 interquartile range of the lower and upper quartiles, respectively.
